# Supplementary material for: Heart Rate Variability in Sports: From Monitoring to Maximizing Recovery and Performance
Source: Research Square preprint supplement (doi:10.21203/rs.3.rs-7129826/v1), 2025-12-10
Supplement: Supplementary file 1 [file 45f0227d41e785033d7300c6.pdf]

## PRISMA 2020 Checklist

Manuscript Title: Heart Rate Variability in Sports: From Monitoring to Maximizing Recovery and Performance

Manuscript ID: 03888132-ae9f-4915-be9e-b57b1f65c388

| Section                            | Checklist Item                                            | Page No. |
|------------------------------------|-----------------------------------------------------------|----------|
| Title                              | Identify the report as a systematic review.               | 1        |
| Abstract                           | Provide a structured summary.                             | 2        |
| Rationale                          | Describe the rationale for the review.                    | 3        |
| Objectives                         | Provide an explicit statement of the objectives.          | 3        |
| Eligibility criteria               | Specify the inclusion and exclusion criteria.             | 4        |
| Information sources                | Specify all databases and sources searched.               | 4        |
| Search strategy                    | Present full search strategy used.                        | 4        |
| Selection process                  | Specify methods used to determine study inclusion.        | 5        |
| Data collection process            | Specify methods for data extraction.                      | 5        |
| Data items                         | List and define all variables for which data were sought. | 5        |
| Risk of bias                       | Specify methods to assess risk of bias.                   | 5        |
| Effect measures                    | Specify the effect measure(s) used.                       | 5        |
| Synthesis methods                  | Describe synthesis methods.                               | 6        |
| Results                            | Present results of individual studies.                    | 6-10     |
| Discussion                         | Summarize main findings, limitations, and implications.   | 10-12    |
| Funding                            | Describe sources of funding and role of funders.          | 13       |
| Availability of data and materials | State data/material availability.                         | 13       |
